# Supplementary material for: Unexpected neutral aza-macrocycle complexes of sodium
Source: Royal Society of Chemistry journal article supplement (doi:10.1039/c4cc01407c), 2014-01-01
Supplement: c4cc01407c1.pdf [file c4cc01407c1.pdf]

## Supplementary information

for

### Unexpected neutral aza-macrocyclic complexes of sodium

Matthew Everett, Andrew Jolleys, William Levason, David Pugh, Gillian Reid

School of Chemistry, University of Southampton, Highfield, Southampton, SO17 1BJ, UK

Tel.: +44 (0)23 8059 3609; e-mail G.Reid@soton.ac.uk

#### Experimental

All preparations were carried out under a dry dinitrogen atmosphere using standard Schlenk and glove box techniques. 1,4,8,11-tetramethyl-1,4,8,11-tetraazacyclotetradecane (Me<sub>4</sub>cyclam) was obtained from Sigma, stored in a glove box and used as received. N,N,N',N'',N''-pentamethyldiethylenetriamine (pmdta) was purchased from Sigma and distilled over CaH<sub>2</sub>. 1,4,7-trimethyl-1,4,7-triazacyclononane (Me<sub>3</sub>tacn) was synthesised according to a literature procedure.<sup>1</sup> NaBAR<sup>F</sup>-2(thf) was synthesised by a slight modification of Brookhart's procedure.<sup>2</sup> In our hands, the last vestiges of colour were removed by dissolving the tan-coloured product in thf, adding hexane to precipitate a white solid, then drying *in vacuo* to remove excess thf. CH<sub>2</sub>Cl<sub>2</sub> was dried by distillation from CaH<sub>2</sub>, thf was distilled from a purple solution of sodium benzophenone ketyl, hexane and toluene were distilled over sodium.

<sup>1</sup>H and <sup>13</sup>C{<sup>1</sup>H} NMR spectra were recorded in CD<sub>2</sub>Cl<sub>2</sub> solutions at 293 K using Bruker AV-300 and DPX-400 spectrometers and are referenced to the residual CH<sub>2</sub>Cl<sub>2</sub> resonance. <sup>23</sup>Na NMR spectra were obtained at 293 K on a Bruker DPX-400 spectrometer with an approximate 0.25 mM concentration of compound in CH<sub>2</sub>Cl<sub>2</sub> and referenced to a 0.1 mol dm<sup>-3</sup> solution of NaCl in D<sub>2</sub>O.<sup>3</sup> Microanalyses were undertaken by Stephen Boyer at London Metropolitan University.

Crystals were obtained as described below. Details of the crystallographic data collection and refinement are in Table S1. Diffractometer: *Rigaku AFC12* goniometer equipped with an enhanced sensitivity (HG) *Saturn724+* detector mounted at the window of an *FR-E+ SuperBright* molybdenum rotating anode generator ( $\lambda_1 = 0.71073$  Å) with VHF *Varimax* optics (70 or 100 µm focus). Cell determination, data collection, data reduction, cell refinement and absorption correction: CrystalClear-SM Expert 2.0 r7.<sup>4</sup> Structure solution and refinement were carried out using WinGX and software packages within.<sup>5</sup> All compounds contained positional disorder of some of the CF<sub>3</sub> groups; a common issue with weakly-coordinating anions containing CF<sub>3</sub> groups, but especially [BAR<sup>F</sup>]<sup>-</sup>.<sup>6</sup> Some

positional disorder was also noted for the thf molecule in compound **1**, and for the macrocyclic ring in compounds **2b**, **3** and the by-product [Me<sub>3</sub>tacnH][BAr<sup>F</sup>] (below). This disorder was modelled satisfactorily using suitable restraints. H atoms attached to C atoms were placed in geometrically assigned positions, with C—H distances of 0.95 Å (CH), 0.98 Å (CH<sub>3</sub>) or 0.99 Å (CH<sub>2</sub>) and refined using a riding model, with  $U_{iso}(H) = 1.2U_{eq}(C)$  (CH, CH<sub>2</sub>) or  $1.5U_{eq}(C)$  (CH<sub>3</sub>). The NH proton in [Me<sub>3</sub>tacnH][BAr<sup>F</sup>] was initially located in the Fourier difference map but added as an idealised proton (AFIX 13) with an N—H distance of 0.93 Å and  $U_{iso}(H) = 1.2U_{eq}(N)$ . enCIFer was used to prepare CIFs for publication.<sup>7</sup> CCDC reference numbers 987718-987721 contain crystallographic data in CIF format.

#### General synthetic method:

NaBAr<sup>F</sup>·2(thf) (240 mg, 0.23 mmol) was suspended in CH<sub>2</sub>Cl<sub>2</sub> (5 mL) and a solution of the amine in CH<sub>2</sub>Cl<sub>2</sub> (2 mL) was added. The reaction was stirred for 4 hours then the product was precipitated by the addition of hexane (30 mL). Crystals were obtained by layering a concentrated CH<sub>2</sub>Cl<sub>2</sub> solution of the product with hexane.

#### (tetrahydrofuran)(pmdta)sodium (κ<sup>1</sup>-tetrakis{3,5-bis(trifluoromethyl)phenyl}borate) (**1**)

40 mg (0.23 mmol) of pmtda was used. Yield: 144 mg of a white solid, 71%.

**δ<sub>H</sub> (400.1 MHz, CD<sub>2</sub>Cl<sub>2</sub>):** 7.74 (8H, s, BAr<sup>F</sup> H2/6), 7.59 (4H, s, BAr<sup>F</sup> H4), 3.69–3.75 (4H, m, OCH<sub>2</sub>), 2.42–2.74 (7H, br m, NCH<sub>3</sub> and CH<sub>2</sub>), 2.32–2.42 (4H, br m, CH<sub>2</sub>), 2.22 (12H, br s, N(CH<sub>3</sub>)<sub>2</sub>), 1.85–1.92 (4H, m, OCH<sub>2</sub>CH<sub>2</sub>) ppm.

**δ<sub>C</sub> (100.6 MHz, CD<sub>2</sub>Cl<sub>2</sub>):** 161.38 (C, q,  $J_{C-B} = 49.9$  Hz, BAr<sup>F</sup> C1), 135.44 (CH, BAr<sup>F</sup> C2/6), 129.51 (BAr<sup>F</sup> C3/5), 125.24 (C, q,  $J_{C-F} = 272$  Hz, CF<sub>3</sub>), 118.13 (CH, BAr<sup>F</sup> C4), 69.22 (OCH<sub>2</sub>), 57.64, 48.80 (NCH<sub>2</sub>) 45.89, 45.26 (NCH<sub>3</sub>), 26.02 (OCH<sub>2</sub>CH<sub>2</sub>) ppm.

**δ<sub>Na</sub> (105.8 MHz, CD<sub>2</sub>Cl<sub>2</sub>):** 2.1 ppm.

**Analysis:** Calc. for C<sub>45</sub>H<sub>43</sub>N<sub>3</sub>OBF<sub>24</sub>Na (1131.62): C, 47.76; H, 3.83; N, 3.71. Found: C, 47.57; H, 3.75; N, 3.81.

#### (tetrahydrofuran)(Me<sub>3</sub>tacn)sodium tetrakis{3,5-bis(trifluoromethyl)phenyl}borate (**2a**)

40 mg (0.23 mmol) of Me<sub>3</sub>tacn was used. Yield: 179 mg of a white crystalline solid, 88%.

**δ<sub>H</sub> (400.1 MHz, CD<sub>2</sub>Cl<sub>2</sub>):** 7.73 (8H, s, BAr<sup>F</sup> H2/6), 7.58 (4H, s, BAr<sup>F</sup> H4), 3.69–3.76 (4H, m, OCH<sub>2</sub>), 2.54–2.64 (6H, m, NCH<sub>2</sub>), 2.28–2.49 (15H, m, NCH<sub>2</sub> and NCH<sub>3</sub>), 1.84–1.91 (4H, m, thf OCH<sub>2</sub>CH<sub>2</sub>) ppm.

**δ<sub>C</sub> (100.6 MHz, CD<sub>2</sub>Cl<sub>2</sub>):** 162.35 (C, q,  $J_{C-B} = 49.9$  Hz, BAr<sup>F</sup> C1), 135.42 (CH, BAr<sup>F</sup> C2/6), 129.65 (BAr<sup>F</sup> C3/5), 125.23 (C, q,  $J_{C-F} = 272$  Hz, CF<sub>3</sub>), 118.11 (CH, BAr<sup>F</sup> C4), 69.24 (OCH<sub>2</sub>), 54.70, 54.20 (NCH<sub>2</sub>) 47.95, 46.70 (NCH<sub>3</sub>), 25.99 (OCH<sub>2</sub>CH<sub>2</sub>) ppm.

$\delta_{\text{Na}}$  (105.8 MHz,  $\text{CD}_2\text{Cl}_2$ ): 3.7 ppm.

**Analysis:** Calc. for  $\text{C}_{45}\text{H}_{41}\text{N}_3\text{OBF}_{24}\text{Na}$  (1129.77): C, 47.84; H, 3.66; N, 3.72. Found: C, 47.75; H, 3.75; N, 3.70.

**Bis( $\text{Me}_3\text{tacn}$ )sodium tetrakis{3,5-bis(trifluoromethyl)phenyl}borate (**2b**)**

80 mg (0.46 mmol) of  $\text{Me}_3\text{tacn}$  was used. Yield: 206 mg of a white solid, 93%.

$\delta_{\text{H}}$  (400.1 MHz,  $\text{CD}_2\text{Cl}_2$ ): 7.75 (8H, s,  $\text{BAr}^{\text{F}}$  H2/6), 7.59 (4H, s,  $\text{BAr}^{\text{F}}$  H4), 2.51–2.68 (16H, m), 2.30–2.51 (26H, br s) ppm.

$\delta_{\text{C}}$  (100.6 MHz,  $\text{CD}_2\text{Cl}_2$ ): 162.56 (C, q,  $J_{\text{C-B}} = 49.9$  Hz,  $\text{BAr}^{\text{F}}$  C1), 135.44 (CH,  $\text{BAr}^{\text{F}}$  C2/6), 129.55 (C, qq,  $^2J_{\text{C-F}} = 31.6, 2.9$  Hz,  $\text{BAr}^{\text{F}}$  C3/5), 125.25 (C, q,  $J_{\text{C-F}} = 272$  Hz,  $\text{CF}_3$ ), 118.11 (CH, septet,  $^3J_{\text{C-F}} = 3.7$  Hz,  $\text{BAr}^{\text{F}}$  C4), 60.00 ( $\text{CH}_2$ ), 54.98 ( $\text{CH}_2$ ) 48.09 ( $\text{CH}_3$ ) ppm.

$\delta_{\text{Na}}$  (105.8 MHz,  $\text{CD}_2\text{Cl}_2$ ): 6.2 ppm.

**Analysis:** Calc. for  $\text{C}_{50}\text{H}_{54}\text{N}_6\text{BF}_{24}\text{Na}$  (1228.94): C, 48.87; H, 4.43; N, 6.84. Found: C, 49.68; H, 4.35; N, 6.70.

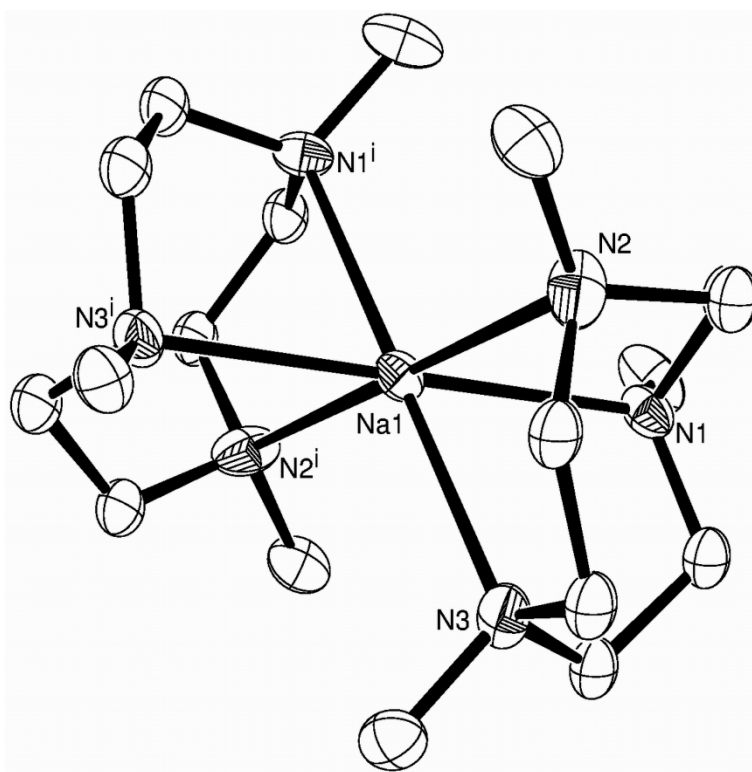

Figure S1. ORTEP representation of the major component of the disordered cation in the asymmetric unit of compound **2b**. The other cation was not disordered and a picture is shown in the main manuscript, along with relevant bond lengths and angles (Figure 2). Thermal ellipsoids at 50% probability. The  $\text{BAr}^{\text{F}}$  anion, which does not interact with the  $\text{Na}^+$  centre, and the H atoms are omitted for clarity. Symmetry code:  $-x, y, -z + 0.5$ .

**(tetrahydrofuran)(Me<sub>4</sub>cyclam)sodium tetrakis{3,5-bis(trifluoromethyl)phenyl}borate (3)**

60 mg (0.23 mmol) of Me<sub>4</sub>cyclam was used. Yield: 199 mg of a white solid, 91%.

**$\delta_{\text{H}}$  (300.1 MHz, CD<sub>2</sub>Cl<sub>2</sub>):** 7.69 (8H, s, BAr<sup>F</sup> H2/6), 7.57 (4H, s, BAr<sup>F</sup> H4), 3.68–3.75 (4H, m, OCH<sub>2</sub>), 2.56–2.67 (4H, m, NCH<sub>2</sub>CH<sub>2</sub>CH<sub>2</sub>N), 2.40 (8H, br s, NCH<sub>2</sub>CH<sub>2</sub>N), 2.31–2.36 (4H, m, NCH<sub>2</sub>CH<sub>2</sub>CH<sub>2</sub>N), 2.17 (12H, s, NCH<sub>3</sub>), 1.75–1.93 (6H, m, CH<sub>2</sub>CH<sub>2</sub>CH<sub>2</sub> and thf OCH<sub>2</sub>CH<sub>2</sub>), 1.46–1.55 (2H, m, CH<sub>2</sub>CH<sub>2</sub>CH<sub>2</sub>) ppm.

**$\delta_{\text{C}}$  (75.5 MHz, CD<sub>2</sub>Cl<sub>2</sub>):** 161.33 (C, q,  $J_{\text{C-B}}$  = 49.8 Hz, BAr<sup>F</sup> C1), 135.39 (CH, BAr<sup>F</sup> C2/6), 128.46 (BAr<sup>F</sup> C3/5), 125.19 (C, q,  $J_{\text{C-F}}$  = 272 Hz, CF<sub>3</sub>), 118.07 (CH, BAr<sup>F</sup> C4), 68.70 (OCH<sub>2</sub>), 57.14 (NCH<sub>2</sub>), 42.64 (NCH<sub>3</sub>), 25.88 (OCH<sub>2</sub>CH<sub>2</sub>), 23.59 (CH<sub>2</sub>CH<sub>2</sub>CH<sub>2</sub>) ppm.

**$\delta_{\text{Na}}$  (105.8 MHz, CD<sub>2</sub>Cl<sub>2</sub>):** 11.4 ppm.

**Analysis:** Calc. for C<sub>50</sub>H<sub>52</sub>N<sub>4</sub>OBF<sub>24</sub>Na (1214.76): C, 49.41; H, 4.32; N, 4.61. Found: C, 49.35; H, 4.24; N, 4.61.

**1*H*-1,4,7-trimethyl-1,4,7-triazacyclononane tetrakis{3,5-bis(trifluoromethyl)phenyl}borate**

These crystals were obtained from a synthesis of compound **2a** which had been inadvertently exposed to air. A few crystals were grown by layering a concentrated CH<sub>2</sub>Cl<sub>2</sub> solution of the hydrolysed product with hexane.

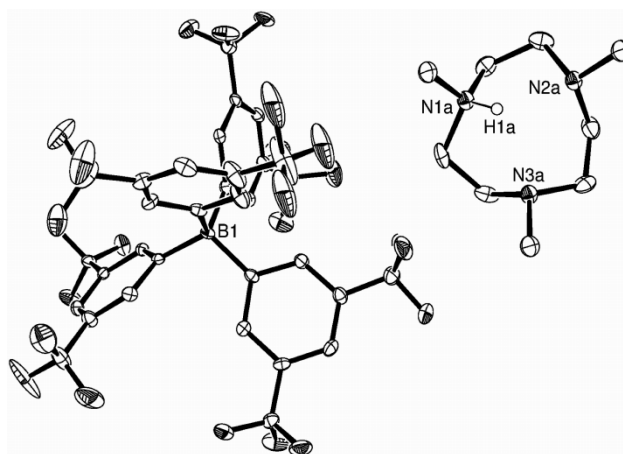

Figure S2. ORTEP representation of [Me<sub>3</sub>tacnH][BAr<sup>F</sup>]. Thermal ellipsoids at 50% probability, hydrogen atoms (bar NH) are omitted for clarity.

| Compound | [Na(pmdta)(thf)(BAr <sup>F</sup> )] (1)                             | [Na(Me <sub>3</sub> tacn) <sub>2</sub> ][BAr <sup>F</sup> ] (2b)   | [Na(Me <sub>4</sub> cyclam)(thf)][BAr <sup>F</sup> ] (3)            | [Me <sub>3</sub> tacnH][BAr <sup>F</sup> ]                      |
|----------|---------------------------------------------------------------------|--------------------------------------------------------------------|---------------------------------------------------------------------|-----------------------------------------------------------------|
| Formula  | C <sub>45</sub> H <sub>43</sub> BF <sub>24</sub> N <sub>3</sub> NaO | C <sub>50</sub> H <sub>54</sub> BF <sub>24</sub> N <sub>6</sub> Na | C <sub>50</sub> H <sub>52</sub> BF <sub>24</sub> N <sub>4</sub> NaO | C <sub>41</sub> H <sub>34</sub> BF <sub>24</sub> N <sub>3</sub> |

|                                               |            |             |            |           |
|-----------------------------------------------|------------|-------------|------------|-----------|
| $M/\text{g mol}^{-1}$                         | 1131.62    | 1228.79     | 1214.76    | 1035.52   |
| Crystal system                                | monoclinic | monoclinic  | triclinic  | triclinic |
| Space group<br>(No.)                          | $Cc$ (9)   | $C2/c$ (15) | $P-1$ (2)  | $P1$ (1)  |
| $a/\text{\AA}$                                | 14.492(4)  | 43.057(2)   | 12.784(2)  | 9.677(1)  |
| $b/\text{\AA}$                                | 14.229(4)  | 12.624(1)   | 12.896(2)  | 10.771(1) |
| $c/\text{\AA}$                                | 24.850(7)  | 21.279(2)   | 18.089(2)  | 10.824(1) |
| $\alpha/^\circ$                               | 90         | 90          | 91.602(2)  | 83.284(6) |
| $\beta/^\circ$                                | 103.181(4) | 100.930(7)  | 98.258(3)  | 82.174(6) |
| $\gamma/^\circ$                               | 90         | 90          | 114.446(2) | 82.924(6) |
| $U/\text{\AA}^3$                              | 4989(2)    | 11356(1)    | 2674.1(7)  | 1103.5(3) |
| $Z$                                           | 4          | 8           | 2          | 1         |
| $\mu(\text{Mo-K}\alpha)$<br>$/\text{mm}^{-1}$ | 0.160      | 0.147       | 0.155      | 0.163     |
| $F(000)$                                      | 2296       | 5024        | 1240       | 522       |
| Total reflections                             | 11845      | 50872       | 27281      | 10486     |
| Unique reflections                            | 8832       | 10019       | 12176      | 7226      |
| $R_{\text{int}}$                              | 0.024      | 0.100       | 0.021      | 0.021     |
| Goodness-of-fit<br>on $F^2$                   | 1.050      | 1.057       | 1.062      | 1.031     |
| $R_1^b [I_o > 2\sigma(I_o)]$                  | 0.072      | 0.092       | 0.058      | 0.051     |
| $R_1$ (all data)                              | 0.087      | 0.164       | 0.067      | 0.064     |
| $wR_2^b [I_o > 2\sigma(I_o)]$                 | 0.161      | 0.235       | 0.136      | 0.105     |

|                   |       |       |       |       |
|-------------------|-------|-------|-------|-------|
| $2\sigma(I_o)$    |       |       |       |       |
| $wR_2$ (all data) | 0.173 | 0.271 | 0.142 | 0.112 |

Table S1: crystallographic data for the compounds reported in this paper. All datasets were collected at 100(2) K. Note: for compound **2b**, positional disorder of the  $[\text{BAr}^{\text{F}}]^-$  anion and one of the macrocycle rings was severe. This required the use of a lot of restraints resulting in high weighted R-factors. Other indicators of data quality such as the standard uncertainties on the unit cell lengths and the C–C bond lengths were acceptable.

## References

- 1) K. Wieghardt, P. Chaudhuri, B. Nuber, J. Weiss, *Inorg. Chem.*, 1982, **21**, 3086.
- 2) M. Brookhart, B. Grant, A. F. Volpe Jr., *Organometallics*, 1992, **11**, 3920.
- 3)  $^{23}\text{Na}$ : 100%,  $I = 3/2$ ,  $\Xi = 26.42$  MHz,  $R_c = 524$ ,  $Q = 0.10 \times 10^{-28} \text{ m}^2$ .
- 4) CrystalClear-SM Expert 2.0 r13, Rigaku Corporation, Tokyo, Japan, 2011.
- 5) L. J. Farrugia, *J. Appl. Cryst.*, 2012, **45**, 849.
- 6) A. B. Chaplin, A. S. Weller, *Eur. J. Inorg. Chem.*, 2010, 5124.
- 7) F. H. Allen, O. Johnson, G. P. Shields, B. R. Smith, M. Towler, *J. Appl. Cryst.*, 2004, **37**, 335.
